# Supplementary material for: Design programmes to maximise participant engagement: a predictive study of programme and participant characteristics associated with engagement in paediatric weight management
Source: PubMed Central journal article supplement (PMC4949908; doi:10.1186/s12966-016-0399-1), 2016-07-19
Supplement: 12966_2016_399_MOESM3_ESM.pdf [file 12966_2016_399_MOESM3_ESM.pdf]

### **Additional File 3: Univariable Regression Models**

The tables below provide the results of all univariable regression models. Each variable was entered into the regression independently alongside the outcome variable. These tables should be used ancillary to the main results table (Table 4) in the paper.

#### ***Model One (Completers vs. Non-Completers)***

| Variable                 | $\beta$ - value | Bivariate Results         |       |       | <i>p</i> -value |
|--------------------------|-----------------|---------------------------|-------|-------|-----------------|
|                          |                 | OR                        | LBCI  | UBCI  |                 |
| Gender†                  | -0.079          | 0.924                     | 0.799 | 1.068 | 0.28            |
| Age                      | -0.015          | 0.985                     | 0.960 | 1.011 | 0.26            |
| Ethnicity†               | 0.150           | 1.162                     | 0.962 | 1.402 | 0.12            |
| IMD Score                | 0.005           | 1.005                     | 1.000 | 1.010 | 0.03            |
| Medical Condition†       | 0.078           | 1.081                     | 0.821 | 1.424 | 0.58            |
| BMI SDS                  | 0.073           | 1.076                     | 0.990 | 1.170 | 0.09            |
| WC SDS                   | 0.101           | 1.107                     | 1.018 | 1.203 | 0.02            |
| Obese or Non-obese †     | 0.065           | 1.067                     | 0.903 | 1.261 | 0.45            |
| Self-esteem              | -0.039          | 0.962                     | 0.893 | 1.036 | 0.30            |
| Sedentary Behaviour      | 0.039           | 1.040                     | 0.990 | 1.092 | 0.12            |
| Body Satisfaction        | -0.002          | 0.998                     | 0.994 | 1.002 | 0.38            |
| Programme Length†        | 0.011           | 1.011                     | 0.873 | 1.172 | 0.88            |
| Programme Year           | 0.122           | 1.130                     | 1.071 | 1.192 | 0.00            |
| Group Size†              | 0.230           | 1.259                     | 1.087 | 1.457 | 0.00            |
| Age Groups†              | -0.013          | 0.987                     | 0.864 | 0.853 | 1.14            |
| Day of Session Delivery† | 0.052           | 1.054                     | 0.908 | 1.223 | 0.49            |
| Delivery Period†         |                 |                           |       |       |                 |
| January Intake           |                 | <i>Reference Category</i> |       |       |                 |
| April Intake             | 0.218           | 1.244                     | 1.046 | 1.479 | 0.01            |
| September Intake         | 0.075           | 1.078                     | 0.904 | 1.287 | 0.40            |

†Categorical variables (dummy coded [0 or 1])

*LBCI*: Lower Boundary of the 95% Confidence Interval

*UBCI*: Upper Boundary of the 95% Confidence Interval

#### ***Model Two (Continuers vs. Initiators)***

| Variable            | $\beta$ - value | Bivariate Results |       |       | <i>p</i> -value |
|---------------------|-----------------|-------------------|-------|-------|-----------------|
|                     |                 | OR                | LBCI  | UBCI  |                 |
| Gender†             | 0.001           | 1.001             | 0.831 | 1.206 | 0.99            |
| Age                 | 0.010           | 1.010             | 0.977 | 1.044 | 0.56            |
| Ethnicity†          | -0.245          | 0.783             | 0.617 | 0.992 | 0.04            |
| IMD Score           | 0.004           | 1.004             | 0.998 | 1.010 | 0.21            |
| Medical Condition†  | 0.123           | 1.130             | 0.804 | 1.591 | 0.48            |
| BMI SDS             | 0.070           | 1.073             | 0.962 | 1.196 | 0.21            |
| WC SDS              | 0.090           | 1.094             | 0.979 | 1.222 | 0.11            |
| Obese or Non-obese† | 0.102           | 1.108             | 0.887 | 1.383 | 0.37            |
| Self-esteem         | 0.014           | 1.014             | 0.928 | 1.109 | 0.75            |
| Sedentary Behaviour | 0.040           | 1.041             | 0.973 | 1.114 | 0.24            |
| Body Satisfaction   | -0.001          | 0.999             | 0.994 | 1.005 | 0.80            |
| Programme Length†   | 0.051           | 1.052             | 0.870 | 1.272 | 0.60            |

|                          |       |                           |       |       |      |
|--------------------------|-------|---------------------------|-------|-------|------|
| Programme Year           | 0.133 | 1.143                     | 1.065 | 1.226 | 0.00 |
| Group Size†              | 0.282 | 1.326                     | 1.101 | 1.598 | 0.00 |
| Age Groups†              | 0.007 | 1.007                     | 0.835 | 1.213 | 0.95 |
| Day of Session Delivery† | 0.043 | 1.044                     | 0.863 | 1.264 | 0.66 |
| Delivery Period†         |       |                           |       |       |      |
| January Intake           |       | <i>Reference Category</i> |       |       |      |
| April Intake             | 0.216 | 1.242                     | 0.996 | 1.548 | 0.05 |
| September Intake         | 0.095 | 1.100                     | 0.874 | 1.384 | 0.42 |

†Categorical variables (dummy coded [0 or 1])

*LBCI*: Lower Boundary of the 95% Confidence Interval

*UBCI*: Upper Boundary of the 95% Confidence Interval

### **Model Three (Completer vs. Late Dropout)**

| Variable                 | $\beta$ - value | Bivariate Results         |       |       | <i>p</i> -value |
|--------------------------|-----------------|---------------------------|-------|-------|-----------------|
|                          |                 | OR                        | LBCI  | UBCI  |                 |
| Gender†                  | -0.066          | 0.936                     | 0.745 | 1.175 | 0.57            |
| Age                      | -0.016          | 0.985                     | 0.944 | 1.026 | 0.47            |
| Ethnicity†               | -0.124          | 0.883                     | 0.661 | 1.181 | 0.40            |
| IMD Score                | 0.002           | 1.002                     | 0.994 | 1.009 | 0.65            |
| Medical Condition†       | 0.235           | 1.265                     | 0.842 | 1.900 | 0.26            |
| BMI SDS                  | 0.155           | 1.168                     | 1.017 | 1.341 | 0.03            |
| WC SDS                   | 0.196           | 1.216                     | 1.060 | 1.395 | 0.01            |
| Obese or Non-obese†      | -0.018          | 0.982                     | 0.756 | 1.276 | 0.89            |
| Self-esteem              | -0.061          | 0.941                     | 0.840 | 1.053 | 0.29            |
| Sedentary Behaviour      | 0.060           | 1.062                     | 0.988 | 1.141 | 0.10            |
| Body Satisfaction        | 0.001           | 1.001                     | 0.994 | 1.008 | 0.77            |
| Programme Length†        | 0.060           | 1.061                     | 0.841 | 1.339 | 0.62            |
| Programme Year           | 0.116           | 1.123                     | 1.033 | 1.222 | 0.01            |
| Group Size†              | -0.032          | 0.969                     | 0.768 | 1.222 | 0.79            |
| Age Groups†              | -0.042          | 0.959                     | 0.762 | 1.205 | 0.72            |
| Day of Session Delivery† | 0.085           | 1.089                     | 0.863 | 1.374 | 0.47            |
| Delivery Period†         |                 |                           |       |       |                 |
| January Intake           |                 | <i>Reference Category</i> |       |       |                 |
| April Intake             | 0.290           | 1.336                     | 1.022 | 1.746 | 0.03            |
| September Intake         | 0.039           | 1.040                     | 0.784 | 1.380 | 0.79            |

†Categorical variables (dummy coded [0 or 1])

*LBCI*: Lower Boundary of the 95% Confidence Interval

*UBCI*: Upper Boundary of the 95% Confidence Interval

### **Model Four (Completer vs. Sporadic Attender)**

| Variable           | $\beta$ - value | Bivariate Results |       |       | <i>p</i> -value |
|--------------------|-----------------|-------------------|-------|-------|-----------------|
|                    |                 | OR                | LBCI  | UBCI  |                 |
| Gender†            | -0.120          | 0.887             | 0.734 | 1.071 | 0.21            |
| Age                | -0.029          | 0.971             | 0.939 | 1.005 | 0.10            |
| Ethnicity†         | 0.505           | 1.656             | 1.264 | 2.171 | 0.00            |
| IMD Score          | 0.007           | 1.007             | 1.001 | 1.013 | 0.03            |
| Medical Condition† | -0.089          | 0.915             | 0.630 | 1.329 | 0.64            |
| BMI SDS            | 0.012           | 1.012             | 0.906 | 1.130 | 0.84            |

|                          |        |                           |       |       |      |
|--------------------------|--------|---------------------------|-------|-------|------|
| WC SDS                   | 0.031  | 1.031                     | 0.923 | 1.152 | 0.59 |
| Obese or Non-obese†      | 0.067  | 1.069                     | 0.859 | 1.330 | 0.55 |
| Self-esteem              | -0.049 | 0.952                     | 0.868 | 1.044 | 0.29 |
| Sedentary Behaviour      | 0.013  | 1.013                     | 0.953 | 1.078 | 0.67 |
| Body Satisfaction        | -0.004 | 0.996                     | 0.991 | 1.002 | 0.17 |
| Programme Length†        | -0.049 | 0.953                     | 0.787 | 1.153 | 0.62 |
| Programme Year           | 0.082  | 1.085                     | 1.012 | 1.163 | 0.02 |
| Group Size†              | 0.279  | 1.322                     | 1.094 | 1.597 | 0.00 |
| Age Groups†              | -0.005 | 0.995                     | 0.823 | 1.203 | 0.96 |
| Day of Session Delivery† | 0.024  | 1.024                     | 0.843 | 1.243 | 0.81 |
| Delivery Period†         |        |                           |       |       |      |
| January Intake           |        | <i>Reference Category</i> |       |       |      |
| April Intake             | 0.109  | 1.115                     | 0.890 | 1.398 | 0.35 |
| September Intake         | 0.061  | 1.063                     | 0.846 | 1.336 | 0.60 |

†Categorical variables (dummy coded [0 or 1])

*LBCI*: Lower Boundary of the 95% Confidence Interval

*UBCI*: Upper Boundary of the 95% Confidence Interval

#### **Model Five (High vs. Low Sporadic Attender)**

| Variable                 | $\beta$ - value | Bivariate Results         |             |             | <i>p</i> -value |
|--------------------------|-----------------|---------------------------|-------------|-------------|-----------------|
|                          |                 | OR                        | <i>LBCI</i> | <i>UBCI</i> |                 |
| Gender†                  | 0.026           | 1.026                     | 0.750       | 1.404       | 0.87            |
| Age                      | -0.063          | 0.939                     | 0.888       | 0.993       | 0.02            |
| Ethnicity†               | 0.649           | 1.914                     | 1.304       | 2.811       | 0.00            |
| IMD Score                | 0.010           | 1.010                     | 1.000       | 1.021       | 0.05            |
| Medical Condition†       | -0.004          | 0.996                     | 0.531       | 1.867       | 0.99            |
| BMI SDS                  | -0.226          | 0.789                     | 0.668       | 0.952       | 0.01            |
| WC SDS                   | -0.120          | 0.887                     | 0.745       | 1.056       | 0.18            |
| Obese or Non-obese†      | 0.550           | 1.733                     | 1.212       | 2.479       | 0.00            |
| Self-esteem              | 0.028           | 1.029                     | 0.884       | 1.197       | 0.71            |
| Sedentary Behaviour      | 0.062           | 1.064                     | 0.962       | 1.178       | 0.23            |
| Body Satisfaction        | -0.002          | 0.998                     | 0.990       | 1.007       | 0.70            |
| Programme Length†        | -1.089          | 0.336                     | 0.242       | 0.467       | 0.00            |
| Programme Year           | 0.207           | 1.230                     | 1.089       | 1.389       | 0.00            |
| Group Size†              | 0.537           | 1.711                     | 1.247       | 2.346       | 0.00            |
| Age Groups†              | 0.194           | 1.214                     | 0.886       | 1.664       | 0.23            |
| Day of Session Delivery† | -0.421          | 0.657                     | 0.474       | 0.910       | 0.01            |
| Delivery Period†         |                 |                           |             |             |                 |
| January Intake           |                 | <i>Reference Category</i> |             |             |                 |
| April Intake             | -0.313          | 0.731                     | 0.502       | 1.066       | 0.10            |
| September Intake         | -0.286          | 0.751                     | 0.513       | 1.100       | 0.14            |

†Categorical variables (dummy coded [0 or 1])

*LBCI*: Lower Boundary of the 95% Confidence Interval

*UBCI*: Upper Boundary of the 95% Confidence Interval
